# Supplementary material for: Les Argiens et leurs dieux : espaces et temps sacrés, acteurs du culte et rites : de l'organisation de la cité (VIIIe s. avant notre ère) à la visite de Pausanias à Argos (IIe s. de notre ère)
Source: Royal Society of Chemistry journal article supplement (doi:10.1039/d2cc06933d), 2010-12-03
Supplement: d2cc06933d1.pdf [file d2cc06933d1.pdf]

## Supporting Information

### Silver Cluster-Assembled Materials for Label-Free DNA Detection

Saikat Das,<sup>[a]</sup> Taishu Sekine,<sup>[a]</sup> Haruna Mabuchi,<sup>[a]</sup> Sakiat Hossain,<sup>[a]</sup> Subhabrata Das,<sup>[b]</sup> Shun Aoki,<sup>[c]</sup> Shuntaro Takahashi\*<sup>[b]</sup> and Yuichi Negishi\*<sup>[a]</sup>

<sup>[a]</sup>Department of Applied Chemistry, Faculty of Science, Tokyo University of Science, Kagurazaka, Shinjuku-ku, Tokyo 162-8601, Japan

<sup>[b]</sup>Chemical Materials Development Department, TANAKA KIKINZOKU KOGYO K.K., Tsukuba Technical Center, 22 Wadai, Tsukuba, Ibaraki 300-4247, Japan

<sup>[c]</sup>Bio Chemical Development Department, TANAKA KIKINZOKU KOGYO K.K., Hiratsuka Technical Center, 2-73, Shinmachi, Hiratsuka, Kanagawa 254-0076, Japan

\*Correspondence to: s-tak@ml.tanaka.co.jp (S.T.), negishi@rs.tus.ac.jp (Y.N.)

## Contents

|                                                                                             |     |
|---------------------------------------------------------------------------------------------|-----|
| 1. Materials and Methods                                                                    | S3  |
| 2. Crystal structure of Ag <sub>14</sub> bpa and Ag <sub>12</sub> bpeb SCAMs                | S5  |
| 3. X-ray diffraction (XRD) patterns of Ag <sub>14</sub> bpa and Ag <sub>12</sub> bpeb SCAMs | S15 |
| 4. Optical microscopy images of Ag <sub>14</sub> bpa and Ag <sub>12</sub> bpeb SCAMs<br>S16 |     |
| 5. Thermal stability analysis                                                               | S17 |
| 6. Chemical stability analysis                                                              | S18 |
| 7. Label-free detection of DNA hybridization with SCAMs                                     | S21 |
| 8. Solid-state <sup>13</sup> C CP/MAS Nuclear Magnetic Resonance (NMR) Spectroscopy         | S24 |
| 9. References                                                                               | S26 |

## 1. Materials and Methods

**1.1. Materials.** All reagents were obtained from commercial sources and used without further purification unless otherwise stated. The solvents were dried and distilled using standard procedures. Silver trifluoroacetate ( $\text{CF}_3\text{COOAg}$ ) and silver nitrate were obtained from FUJIFILM Wako Pure Chemical Corporation. Methanol and acetonitrile were obtained from Kanto Chemical Co., Inc.

DNA sequences were synthesized by FASMAC Co., Ltd. (Kanagawa, Japan) as described below<sup>1</sup>:

Probe DNA: 5'-AGTCAGTGTGGAAAATCTCTAGC-3'

Target DNA: 5'-GCTAGAGATTTTCCCACTGACT-3'

Probe DNA is the complementary sequence of HIV-1 U5. Target DNA is HIV-1 U5 sequence.

DNA buffer solutions were prepared by dissolving DNA into 10 mM phosphate buffer (pH 7.4, containing 7.54 mM Sodium hydrogen phosphate and 2.46 mM Sodium dihydrogen phosphate).

**1.2. Instrumentation.** Regarding the single-crystal X-ray diffraction (SCXRD) measurements, the single crystals of SCAMs were immersed in cryoprotectant Parabar 10312 (Hampton Research, 34 Journey, Aliso Viejo, CA 92656-3317 USA) followed by mounting the samples on a Dual-Thickness MicroMounts™ (MiTeGen, LLC, Ithaca, NY, USA). The X-ray diffraction data sets were acquired on a Bruker D8 QUEST diffractometer using monochromated  $\text{MoK}\alpha$  radiation ( $\lambda = 0.71073 \text{ \AA}$ ). Bruker Apex3<sup>2</sup> software suite was used to resolve the crystal structures. Powder X-ray diffraction (PXRD) measurements were conducted on a Rigaku Ultima IV X-ray diffractometer operated at 40 kV and 20 mA with  $\text{CuK}\alpha$  radiation at step size of  $0.02^\circ$  and scan speed of 2 s per step. Scanning electron microscopy (SEM) was performed on a JEOL JSM-7800F Prime field emission scanning electron microscope (FE-SEM). High-resolution transmission electron microscopy (HRTEM) and fast Fourier transform (FFT) analysis was carried out on a JEOL JEM-2100F microscope. Thermogravimetric analysis (TGA)/Differential thermal analysis (DTA) traces were recorded on a BRUKER NETZSCH TG-DTA 2000SA under  $\text{N}_2$  flow ( $20 \text{ mL min}^{-1}$ ) over the temperature range of 25 to 700 °C with a gradient of  $10 \text{ }^\circ\text{C min}^{-1}$ . Liquid-state NMR spectra of the linkers were recorded on a Bruker-Biospin Avance Neo 400 NMR spectrometer. Zeta potential measurements were carried out using a Malvern Zetasizer Ultra Blue instrument. Fluorescence measurements were captured using an EnSpire plate reader, Perkin Elmer with an excitation wavelength of 490 nm, and the emission wavelength was recorded at 521 nm.

**1.3. Synthesis of silver *tert*-butylthiolate ( $\text{AgS}^t\text{Bu}$ ).**  $\text{AgS}^t\text{Bu}$  was prepared according to a reported procedure<sup>3</sup> and the reaction was handled in a fume hood. 0.55 g (3.25 mmol) of silver nitrate was introduced in a 50 mL Erlenmeyer flask followed by the addition of 7.5 mL of acetonitrile. The solution was stirred for 10 min after which 1.24 mL (0.11 mol) of *tert*-butyl mercaptan was added to it. The

resulting solution was stirred for 15 min. The white precipitate was isolated by centrifugation, washed with methanol (10 × 50 mL) until the odor disappeared and acetonitrile (2 × 50 mL), and subsequently dried under vacuum to afford a white powder of AgStBu (yield 95%).

**1.4. Syntheses of 1,2-bis(4-pyridyl)acetylene (bpa) and 1,4-bis(pyridin-4-ylethynyl)benzene (bpeb).** bpa and bpeb linkers were prepared according to a previous report<sup>4</sup>.

**1.5. Synthesis of  $[\text{Ag}_{14}(\text{S}^t\text{Bu})_{10}(\text{CF}_3\text{COO})_4(\text{bpa})_2]_n$ .** AgS<sup>t</sup>Bu (0.03 g, 0.15 mmol) and CF<sub>3</sub>COOAg (0.022 g, 0.1 mmol) were weighed in a mighty vial. To this was added 5 mL of a solvent mixture of acetonitrile/chloroform (1:1, v/v) and stirred to form a clear solution **1** which was stored in ice-bath. Next, bpa (0.03 g, 0.166 mmol) was dissolved in 5 mL of a solvent mixture of acetonitrile/chloroform (1:1, v/v) under stirring to form a clear solution **2** which was stored in ice-bath. Solution **2** was added dropwise by pipette to solution **1** in ice-bath and mixed well. The resulting mixture was stored in refrigerator for slow evaporation. After 36 h, yellow crystals of  $[\text{Ag}_{14}(\text{S}^t\text{Bu})_{10}(\text{CF}_3\text{COO})_4(\text{bpa})_2]_n$  were obtained (40 mg, 68.5% yield based on Ag). Elemental analysis (%) for evacuated Ag<sub>14</sub>bpa: calcd. C 26.90, H 3.30, N 1.70; found C 28.79, H 2.60, N 2.67.

**1.6. Synthesis of  $[\text{Ag}_{12}(\text{S}^t\text{Bu})_6(\text{CF}_3\text{COO})_6(\text{bpeb})_3]_n$ .** AgS<sup>t</sup>Bu (0.03 g, 0.15 mmol) and CF<sub>3</sub>COOAg (0.022 g, 0.1 mmol) were weighed in a mighty vial. To this was added 10 mL of a solvent mixture of dimethylacetamide/toluene (1:1, v/v) and stirred to form a clear solution **1** which was stored in ice-bath. Next, bpeb (0.045 g, 0.16 mmol) was dissolved in 10 mL of a solvent mixture of dimethylacetamide/toluene (1:1, v/v) under stirring to form a clear solution **2** which was stored in ice-bath. Solution **2** was added dropwise by pipette to solution **1** in ice-bath and mixed well. The resulting mixture was stored in room temperature for slow evaporation. After 24 h, colorless crystals of  $[\text{Ag}_{12}(\text{S}^t\text{Bu})_6(\text{CF}_3\text{COO})_6(\text{bpeb})_3]_n$  were obtained (47 mg, 66.2% yield based on Ag). Elemental analysis (%) for evacuated Ag<sub>12</sub>bpeb: calcd. C 34.00, H 2.70, N 3.70; found C 34.53, H 2.77, N 2.51.

## 2. Crystal structure of Ag<sub>14</sub>bpa and Ag<sub>12</sub>bpeb SCAMs

Table S1. Crystal data and structure refinement for Ag<sub>14</sub>bpa

|                                                              |                                                                                                                 |
|--------------------------------------------------------------|-----------------------------------------------------------------------------------------------------------------|
| Identification code                                          | Ag <sub>14</sub> bpa                                                                                            |
| Empirical formula                                            | C <sub>72</sub> H <sub>106</sub> Ag <sub>14</sub> F <sub>12</sub> N <sub>4</sub> O <sub>8</sub> S <sub>10</sub> |
| Formula weight                                               | 3214.38                                                                                                         |
| Temperature/K                                                | 100.15                                                                                                          |
| Crystal system                                               | monoclinic                                                                                                      |
| Space group                                                  | C2/c                                                                                                            |
| <i>a</i> /Å                                                  | 23.2587(6)                                                                                                      |
| <i>b</i> /Å                                                  | 14.7272(4)                                                                                                      |
| <i>c</i> /Å                                                  | 30.0370(8)                                                                                                      |
| <i>α</i> /°                                                  | 90                                                                                                              |
| <i>β</i> /°                                                  | 102.5260(10)                                                                                                    |
| <i>γ</i> /°                                                  | 90                                                                                                              |
| Volume/Å <sup>3</sup>                                        | 10043.8(5)                                                                                                      |
| <i>Z</i>                                                     | 4                                                                                                               |
| $\rho_{\text{calc}}/\text{g cm}^{-3}$                        | 2.126                                                                                                           |
| $\mu/\text{mm}^{-1}$                                         | 2.940                                                                                                           |
| <i>F</i> (000)                                               | 6224.0                                                                                                          |
| Crystal size/mm <sup>3</sup>                                 | 1.2 × 0.8 × 0.6                                                                                                 |
| Radiation                                                    | MoK $\alpha$ ( $\lambda$ = 0.71073)                                                                             |
| 2 $\theta$ range for data collection/°                       | 4.556 to 50.78                                                                                                  |
| Index ranges                                                 | -28 ≤ <i>h</i> ≤ 28, -17 ≤ <i>k</i> ≤ 17, -36 ≤ <i>l</i> ≤ 36                                                   |
| Reflections collected                                        | 84924                                                                                                           |
| Independent reflections                                      | 9234 [ <i>R</i> <sub>int</sub> = 0.0402, <i>R</i> <sub>sigma</sub> = 0.0194]                                    |
| Data/restraints/parameters                                   | 9234/0/556                                                                                                      |
| Goodness-of-fit on <i>F</i> <sup>2</sup>                     | 1.082                                                                                                           |
| Final <i>R</i> indexes [ <i>I</i> ≥ 2 $\sigma$ ( <i>I</i> )] | <i>R</i> <sub>1</sub> = 0.0195, <i>wR</i> <sub>2</sub> = 0.0396                                                 |
| Final <i>R</i> indexes [all data]                            | <i>R</i> <sub>1</sub> = 0.0214, <i>wR</i> <sub>2</sub> = 0.0403                                                 |
| Largest diff. peak/hole / e Å <sup>-3</sup>                  | 1.57/-1.45                                                                                                      |

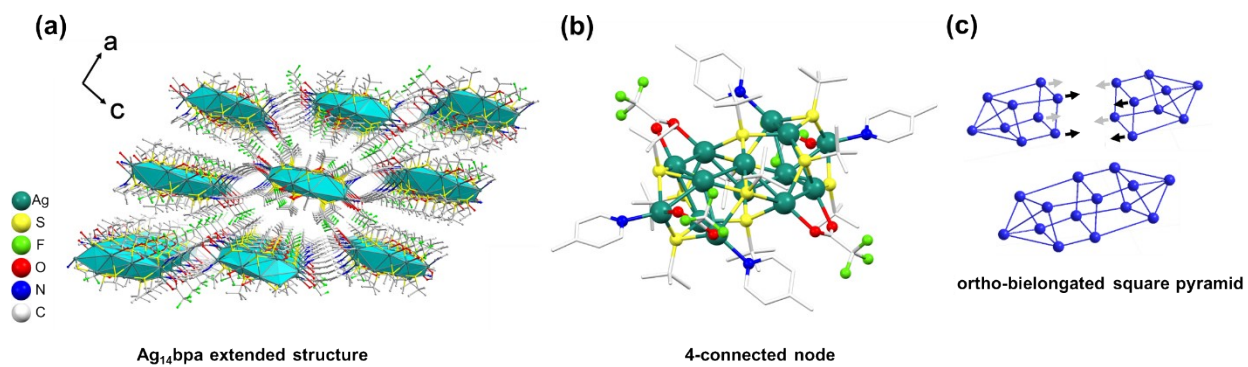

**Figure S1:** (a) Extended structure and (b,c) distorted ortho-bielongated square pyramidal cluster core of  $Ag_{14}bpa$ .

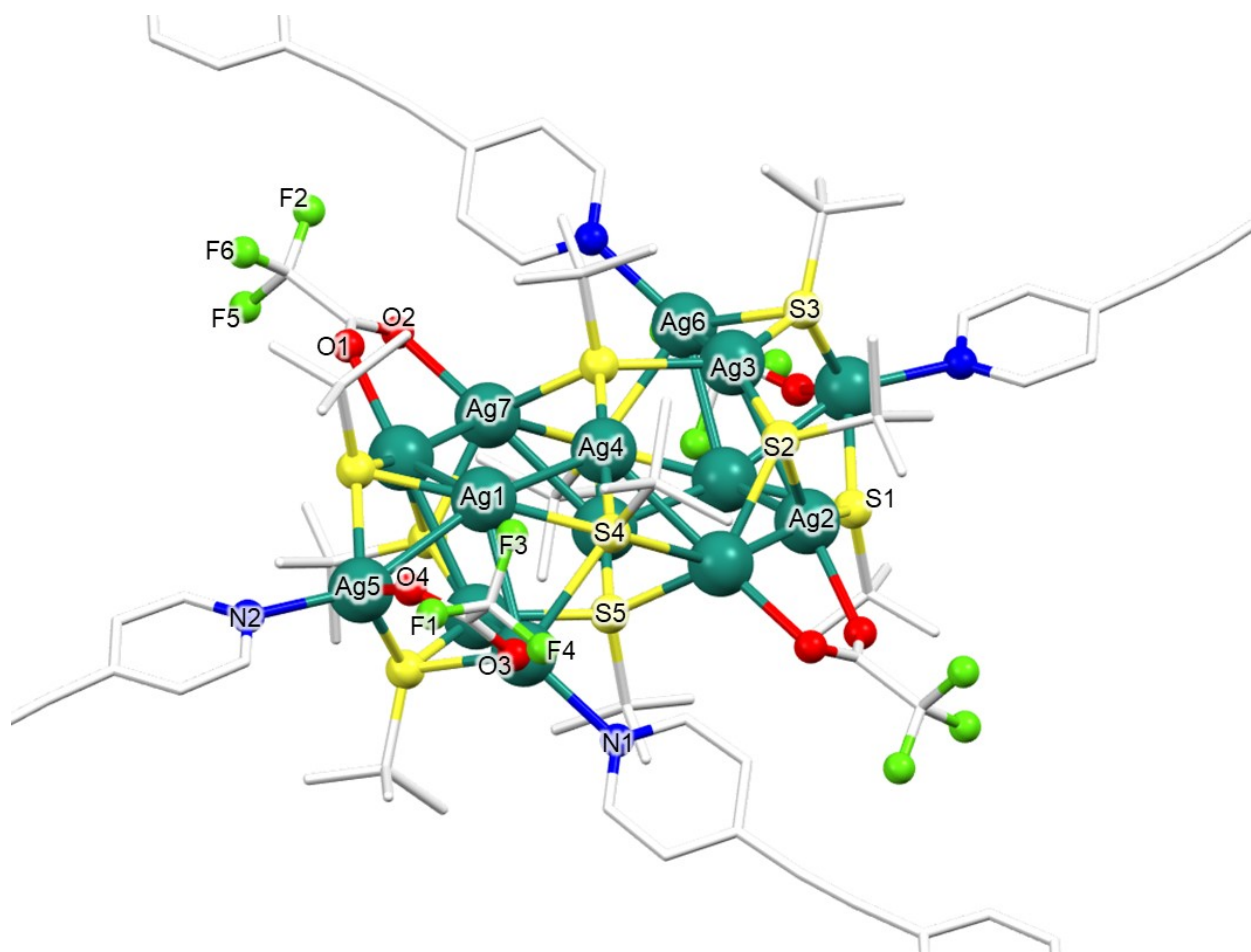

**Figure S2:** Labeled  $Ag_{14}$  core with ten  $S^tBu^-$  and four  $CF_3COO^-$  ligands and four bpa linkers.

**Table S2: Ag–Ag bond lengths in the Ag<sub>14</sub> cluster node of Ag<sub>14</sub>bpa**

| Atom 1 | Atom 2 | Bond length /Å |                | Bond length /Å |
|--------|--------|----------------|----------------|----------------|
| Ag6    | Ag3    | 3.2217(8)      | <b>Maximum</b> | 3.2217         |
| Ag2    | Ag3    | 3.1945(6)      | <b>Minimum</b> | 2.9263         |
| Ag1    | Ag5    | 3.0313(5)      | <b>Average</b> | 3.0313         |
| Ag1    | Ag4    | 2.9829(6)      | <b>S.D.</b>    | 0.1060         |
| Ag4    | Ag7    | 2.9777(6)      |                |                |
| Ag1    | Ag2    | 2.9622(7)      |                |                |
| Ag1    | Ag6    | 2.9539(6)      |                |                |
| Ag7    | Ag2    | 2.9263(7)      |                |                |

**Table S3: Ag–S bond lengths for the four  $\mu_3$ -S binding to Ag atoms on the square faces and two  $\mu_4$ -S binding to Ag atoms on the square faces**

| <b>Four <math>\mu_3</math>-S binding to Ag atoms on the square faces</b> |      |                |                |                |
|--------------------------------------------------------------------------|------|----------------|----------------|----------------|
| Atom                                                                     | Atom | Bond length /Å |                | Bond length /Å |
| S5                                                                       | Ag3  | 2.5629(7)      | <b>Maximum</b> | 2.5629         |
| Ag4                                                                      | S5   | 2.3897(8)      | <b>Minimum</b> | 2.3897         |
| Ag7                                                                      | S5   | 2.4950(8)      | <b>Average</b> | 2.5021         |
| Ag7                                                                      | S2   | 2.5331(8)      | <b>S.D.</b>    | 0.0563         |
| Ag2                                                                      | S2   | 2.4909(9)      |                |                |
| Ag3                                                                      | S2   | 2.5415(8)      |                |                |
| <b>Two <math>\mu_4</math>-S binding to Ag atoms on the square faces</b>  |      |                |                |                |
| S4                                                                       | Ag6  | 2.7499(7)      | <b>Maximum</b> | 3.0428         |
| S4                                                                       | Ag7  | 3.0428(8)      | <b>Minimum</b> | 2.3995         |
| Ag1                                                                      | S4   | 2.3995(7)      | <b>Average</b> | 2.6560         |
| Ag4                                                                      | S4   | 2.4321(8)      | <b>S.D.</b>    | 0.2618         |

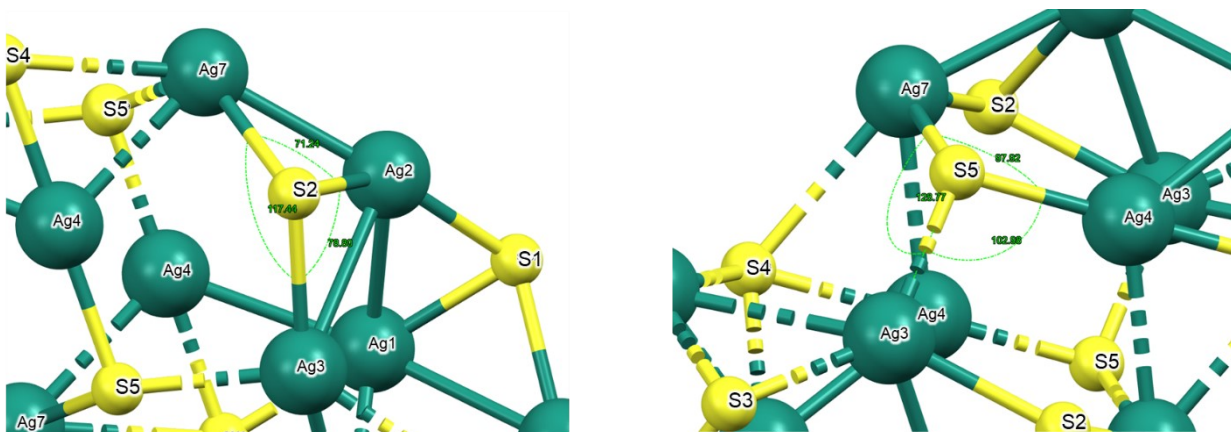

**Figure S3:** Ag–S–Ag bond angle for the four  $\mu_3$ -S binding to Ag atoms on the square faces.

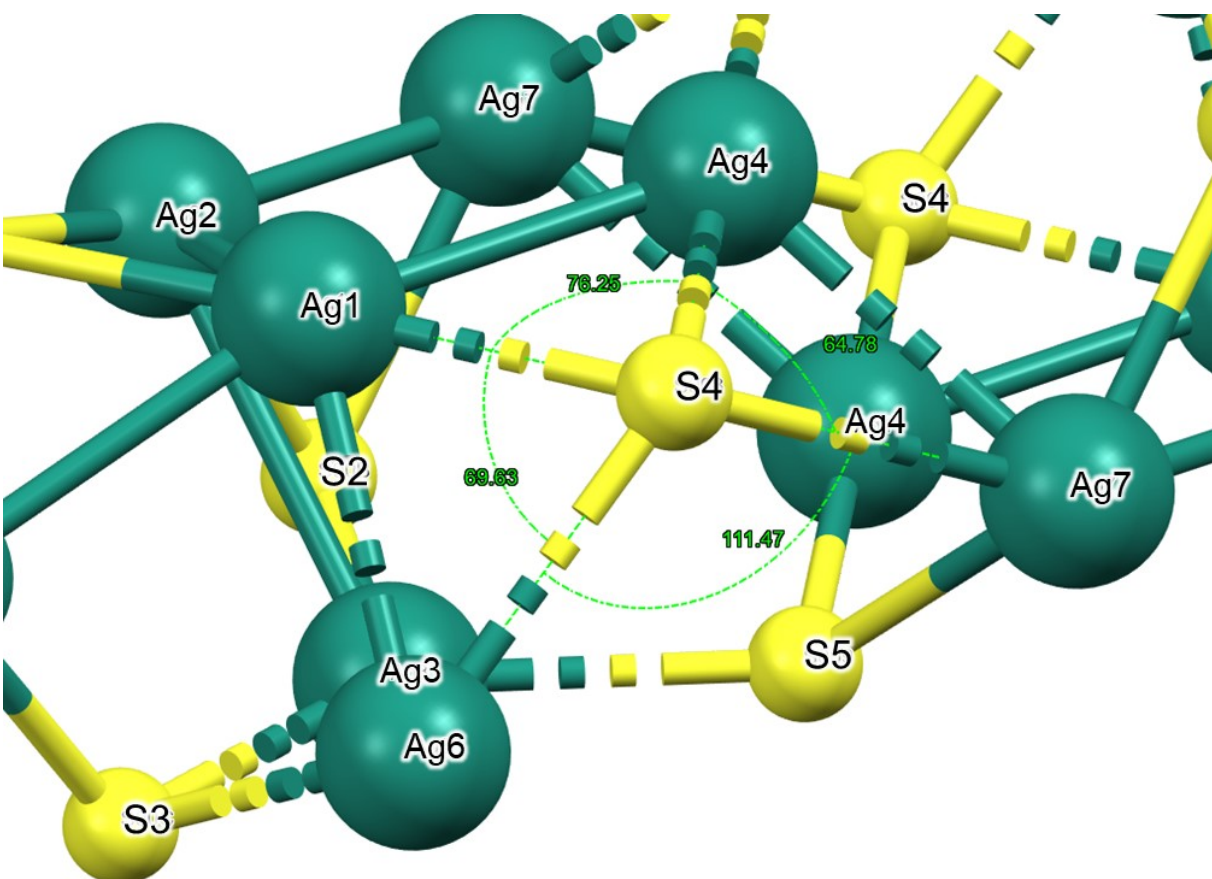

**Figure S4:** Ag–S–Ag bond angle for the two  $\mu_4$ -S binding to Ag atoms on the square faces.



Table S4: Ag–S bond lengths for the four  $\mu_3$ -S binding to Ag atoms on the triangular faces

| Atom 1 | Atom 2 | Bond length /Å |                | Bond length /Å |
|--------|--------|----------------|----------------|----------------|
| Ag6    | S3     | 2.4877(8)      | <b>Maximum</b> | 2.5756         |
| Ag5    | S3     | 2.4871(9)      | <b>Minimum</b> | 2.3934         |
| Ag3    | S3     | 2.4271(8)      | <b>Average</b> | 2.4691         |
| Ag1    | S1     | 2.3934(7)      | <b>S.D.</b>    | 0.0579         |
| Ag2    | S1     | 2.4441(8)      |                |                |
| Ag5    | S1     | 2.5756(8)      |                |                |

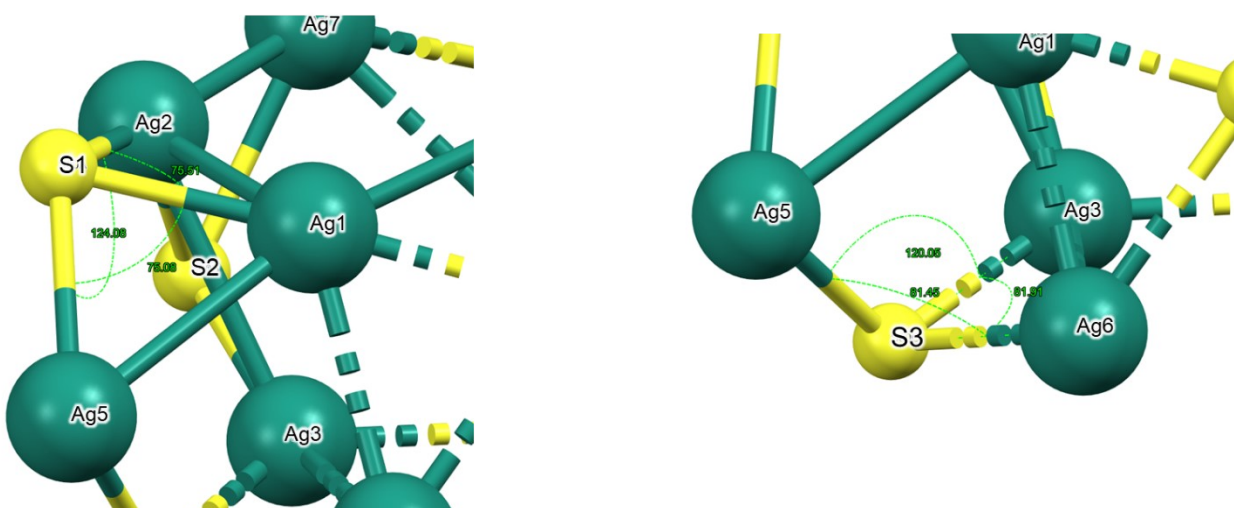

Figure S5: Ag–S–Ag bond angle for the four  $\mu_3$ -S binding to Ag atoms on the triangular faces.

**Table S5: Ag–O bond lengths for the two  $\mu_2$ -CF<sub>3</sub>COO<sup>-</sup> binding to Ag atoms on the square faces and two  $\mu_2$ -CF<sub>3</sub>COO<sup>-</sup> binding to Ag atoms on the triangular faces**

| <b>Two <math>\mu_2</math>-CF<sub>3</sub>COO<sup>-</sup> binding to Ag atoms on the square faces</b>     |             |                       |                |                       |
|---------------------------------------------------------------------------------------------------------|-------------|-----------------------|----------------|-----------------------|
| <b>Atom</b>                                                                                             | <b>Atom</b> | <b>Bond length /Å</b> |                | <b>Bond length /Å</b> |
| Ag7                                                                                                     | O2          | 2.311(2)              | <b>Maximum</b> | 2.422                 |
| Ag2                                                                                                     | O1          | 2.422(2)              | <b>Minimum</b> | 2.311                 |
|                                                                                                         |             |                       | <b>Average</b> | 2.3665                |
|                                                                                                         |             |                       | <b>S.D.</b>    | 0.0555                |
| <b>Two <math>\mu_2</math>-CF<sub>3</sub>COO<sup>-</sup> binding to Ag atoms on the triangular faces</b> |             |                       |                |                       |
| Ag6                                                                                                     | O3          | 2.472(2)              | <b>Maximum</b> | 2.472                 |
| Ag5                                                                                                     | O4          | 2.339(2)              | <b>Minimum</b> | 2.339                 |
|                                                                                                         |             |                       | <b>Average</b> | 2.4055                |
|                                                                                                         |             |                       | <b>S.D.</b>    | 0.0665                |

**Table S6: Ag–N bond lengths for the Ag<sub>14</sub> clusters linked by four bpa linkers**

| <b>Atom 1</b> | <b>Atom 2</b> | <b>Bond length /Å</b> |                | <b>Bond length /Å</b> |
|---------------|---------------|-----------------------|----------------|-----------------------|
| Ag6           | N1            | 2.316(2)              | <b>Maximum</b> | 2.319                 |
| Ag5           | N2            | 2.319(2)              | <b>Minimum</b> | 2.316                 |
|               |               |                       | <b>Average</b> | 2.3175                |
|               |               |                       | <b>S.D.</b>    | 0.0015                |

**Table S7. Crystal data and structure refinement for Ag<sub>12</sub>bpeb**

|                                                              |                                                                                                                |
|--------------------------------------------------------------|----------------------------------------------------------------------------------------------------------------|
| Identification code                                          | Ag <sub>12</sub> bpeb                                                                                          |
| Empirical formula                                            | C <sub>96</sub> H <sub>90</sub> Ag <sub>12</sub> F <sub>18</sub> N <sub>6</sub> O <sub>12</sub> S <sub>6</sub> |
| Formula weight                                               | 3348.53                                                                                                        |
| Temperature/K                                                | 100.15                                                                                                         |
| Crystal system                                               | trigonal                                                                                                       |
| Space group                                                  | R-3m                                                                                                           |
| <i>a</i> /Å                                                  | 28.808(2)                                                                                                      |
| <i>b</i> /Å                                                  | 28.808(2)                                                                                                      |
| <i>c</i> /Å                                                  | 11.3966(14)                                                                                                    |
| <i>α</i> /°                                                  | 90                                                                                                             |
| <i>β</i> /°                                                  | 90                                                                                                             |
| <i>γ</i> /°                                                  | 120                                                                                                            |
| Volume/Å <sup>3</sup>                                        | 8190.8(16)                                                                                                     |
| <i>Z</i>                                                     | 3                                                                                                              |
| $\rho_{\text{calc}}$ /g/cm <sup>3</sup>                      | 2.037                                                                                                          |
| $\mu$ /mm <sup>-1</sup>                                      | 2.304                                                                                                          |
| <i>F</i> (000)                                               | 4878.0                                                                                                         |
| Crystal size/mm <sup>3</sup>                                 | 0.6 × 0.6 × 0.6                                                                                                |
| Radiation                                                    | MoK $\alpha$ ( $\lambda$ = 0.71073)                                                                            |
| 2 $\theta$ range for data collection/°                       | 3.93 to 47.68                                                                                                  |
| Index ranges                                                 | -32 ≤ <i>h</i> ≤ 30, -29 ≤ <i>k</i> ≤ 32, -12 ≤ <i>l</i> ≤ 12                                                  |
| Reflections collected                                        | 9122                                                                                                           |
| Independent reflections                                      | 1508 [ <i>R</i> <sub>int</sub> = 0.1184, <i>R</i> <sub>sigma</sub> = 0.0709]                                   |
| Data/restraints/parameters                                   | 1508/90/129                                                                                                    |
| Goodness-of-fit on <i>F</i> <sup>2</sup>                     | 1.040                                                                                                          |
| Final <i>R</i> indexes [ <i>I</i> ≥ 2 $\sigma$ ( <i>I</i> )] | <i>R</i> <sub>1</sub> = 0.0502, <i>wR</i> <sub>2</sub> = 0.1248                                                |
| Final <i>R</i> indexes [all data]                            | <i>R</i> <sub>1</sub> = 0.0615, <i>wR</i> <sub>2</sub> = 0.1321                                                |
| Largest diff. peak/hole / e Å <sup>-3</sup>                  | 1.90/-1.75                                                                                                     |

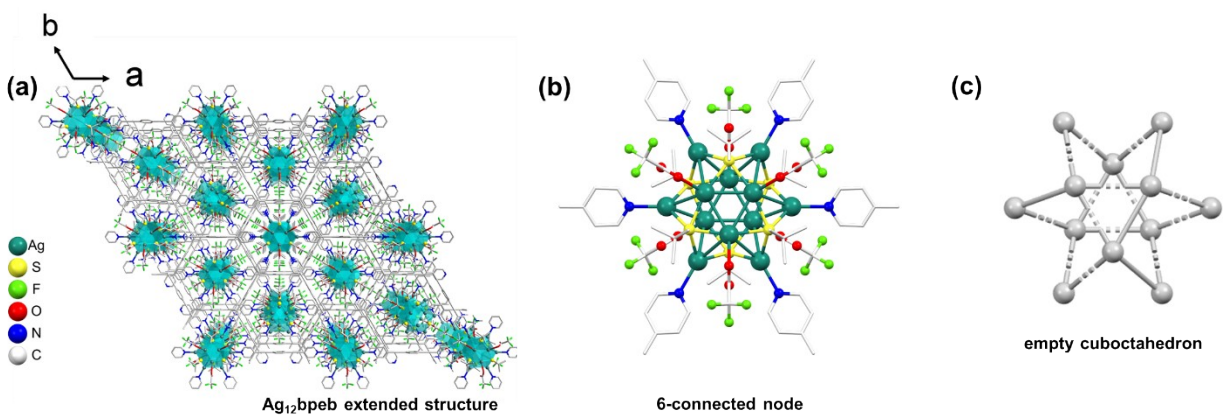

**Figure S6:** (a) Extended structure and (b,c) cuboctahedral cluster core of  $\text{Ag}_{12}\text{bpeb}$ .

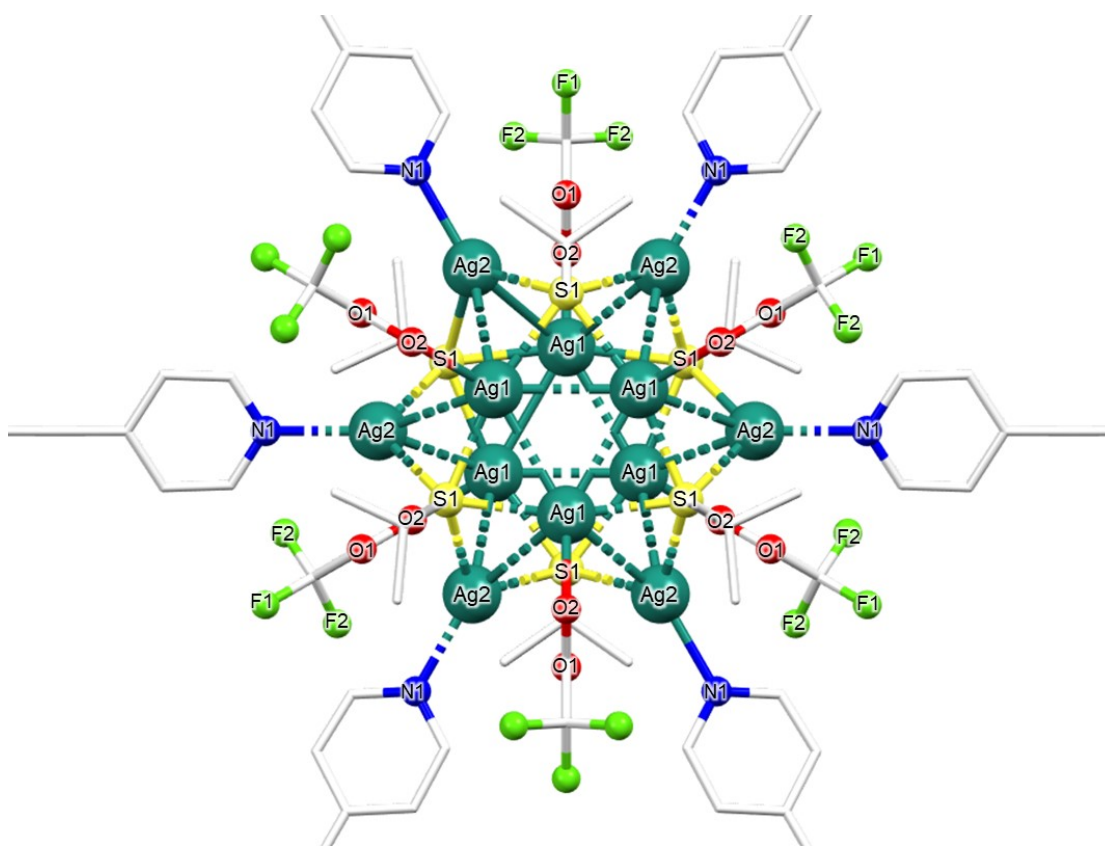

**Figure S7:** Labeled  $\text{Ag}_{12}$  core with six S'Bu<sup>-</sup> and six CF<sub>3</sub>COO<sup>-</sup> ligands and six bpeb linkers.

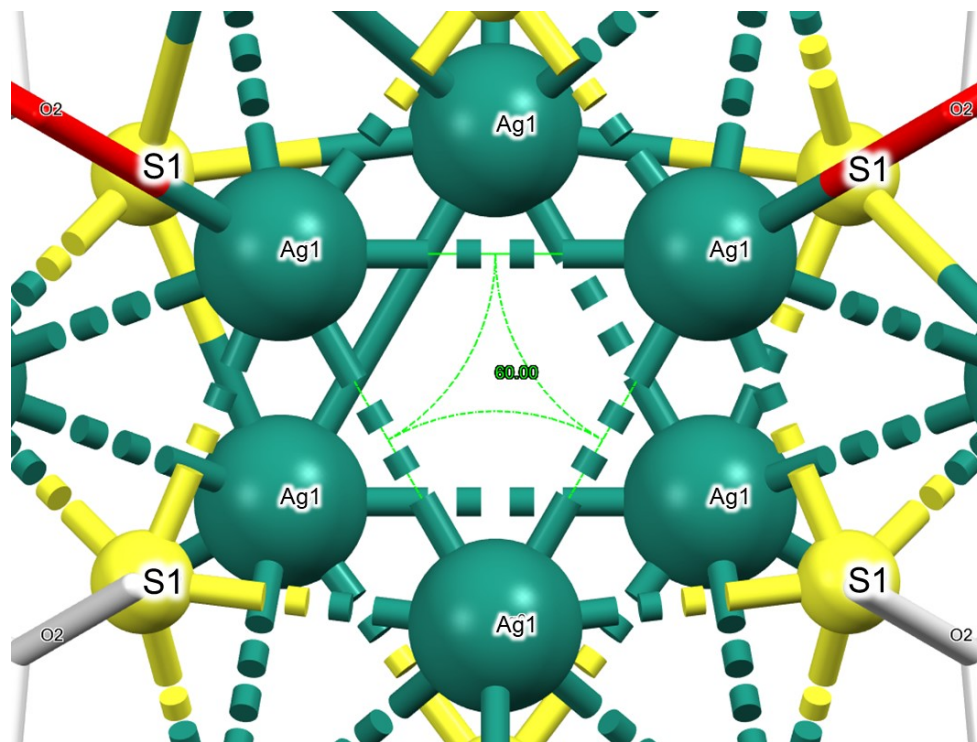

**Figure S8:** Ag1–Ag1–Ag1 bond angle in Ag<sub>12</sub> core.

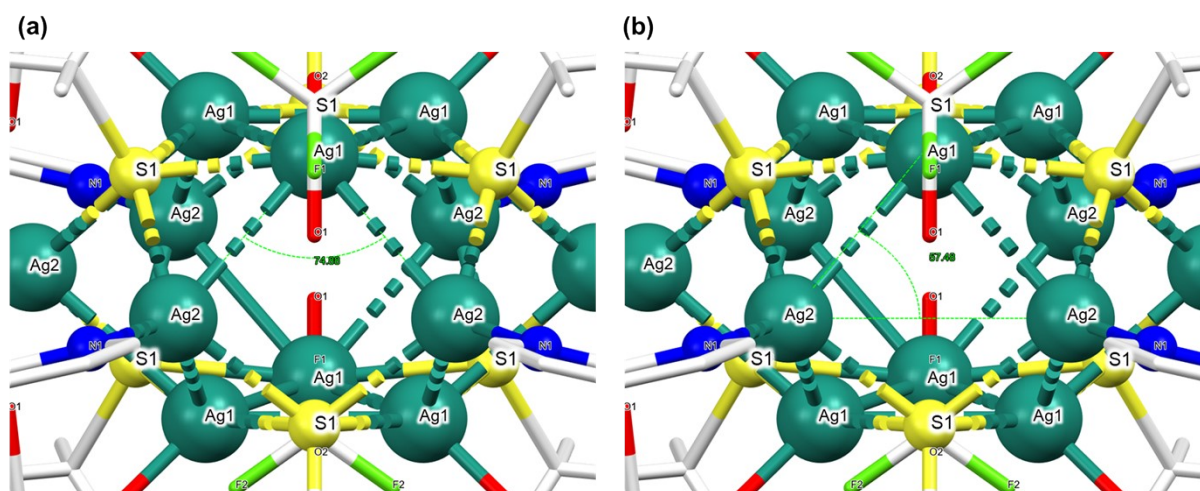

**Figure S9:** (a) Ag2–Ag1–Ag2 and (b) Ag1–Ag2–Ag2 bond angles in Ag<sub>12</sub> core.

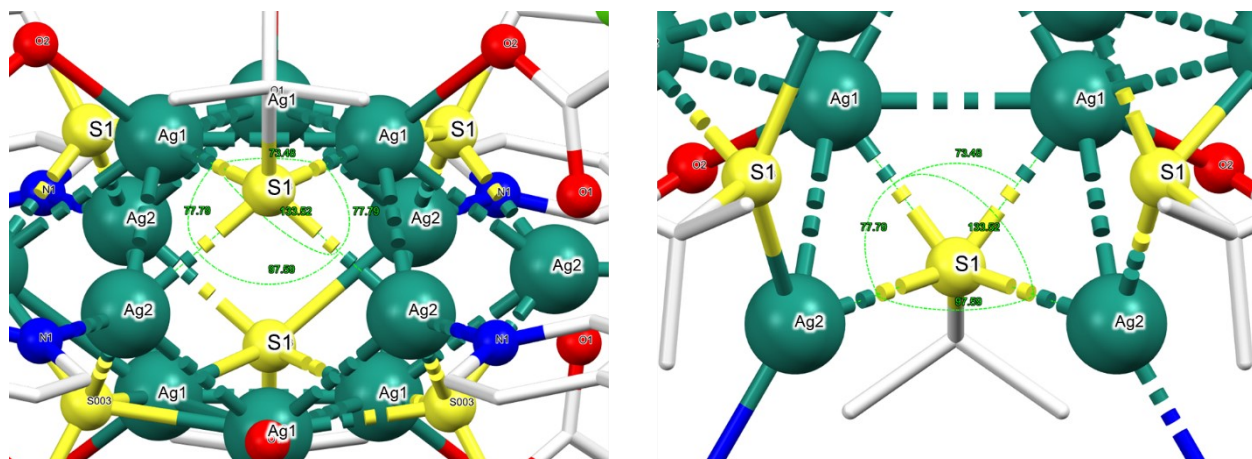

**Figure S10:** Ag–S–Ag bond angles for the six  $\mu_4$ -S binding to Ag atoms.

### 3. X-ray diffraction (XRD) patterns of Ag<sub>14</sub>bpa and Ag<sub>12</sub>bpeb SCAMs

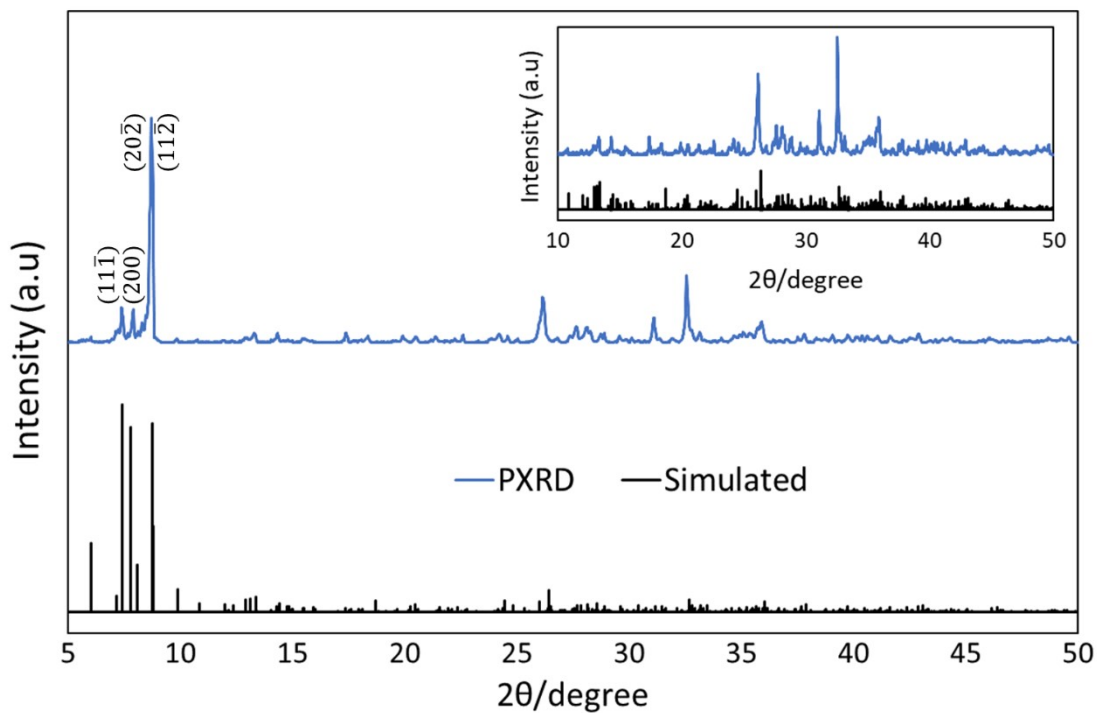

Figure S11: XRD patterns of Ag<sub>14</sub>bpa.

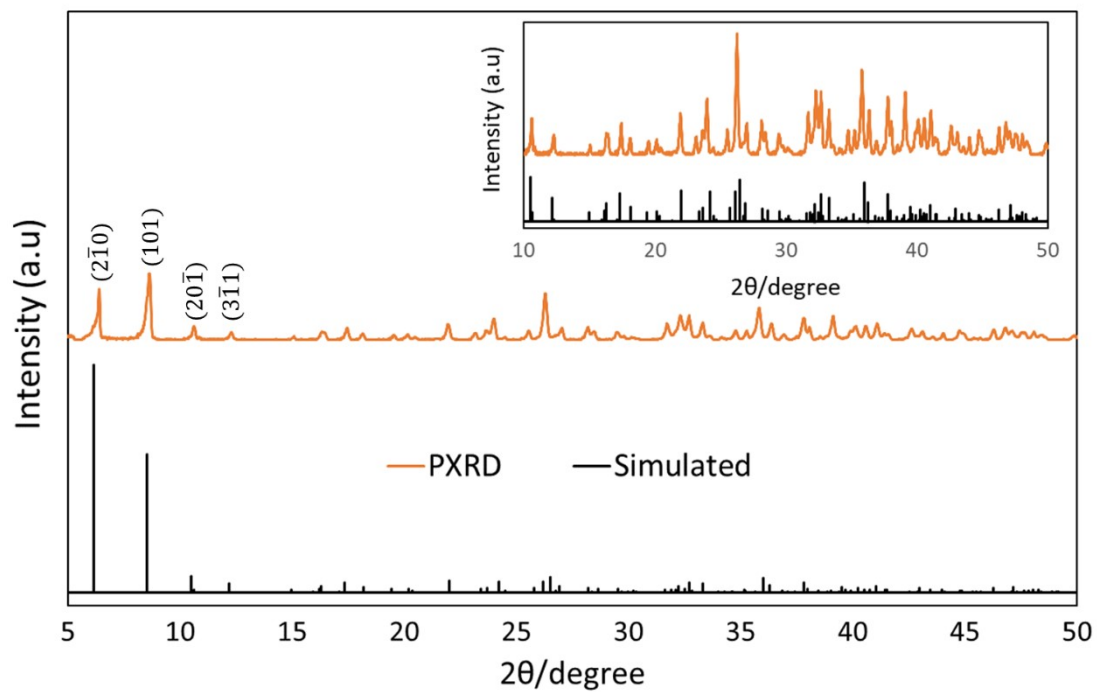

Figure S12: XRD patterns of Ag<sub>12</sub>bpeb.

#### 4. Optical microscopy images of $\text{Ag}_{14}\text{bpa}$ and $\text{Ag}_{12}\text{bpeb}$ SCAMs

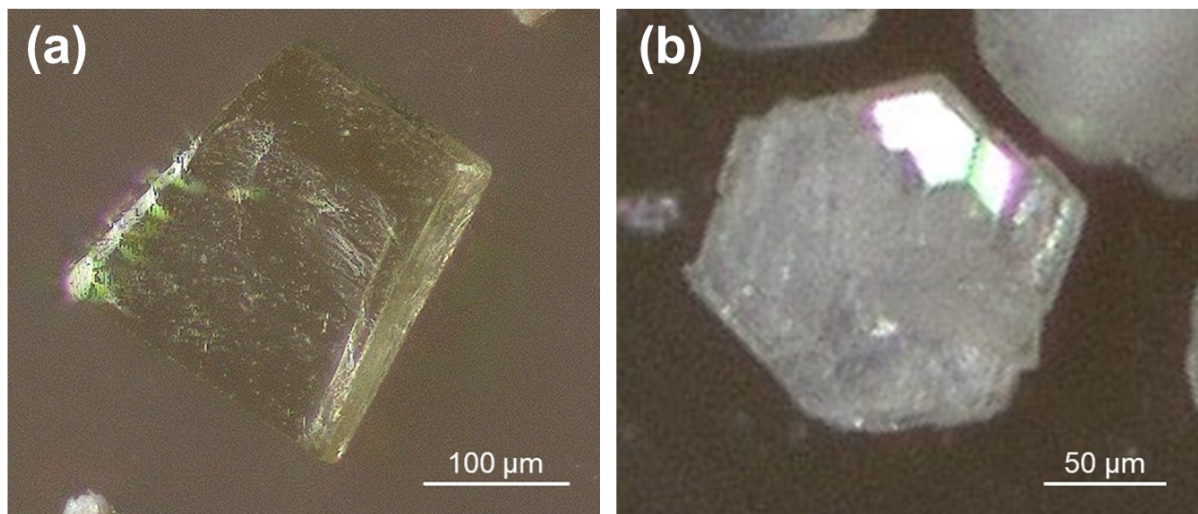

**Figure S13:** Optical microscopy images of (a)  $\text{Ag}_{14}\text{bpa}$  and (b)  $\text{Ag}_{12}\text{bpeb}$ .



## 5. Thermal stability analysis

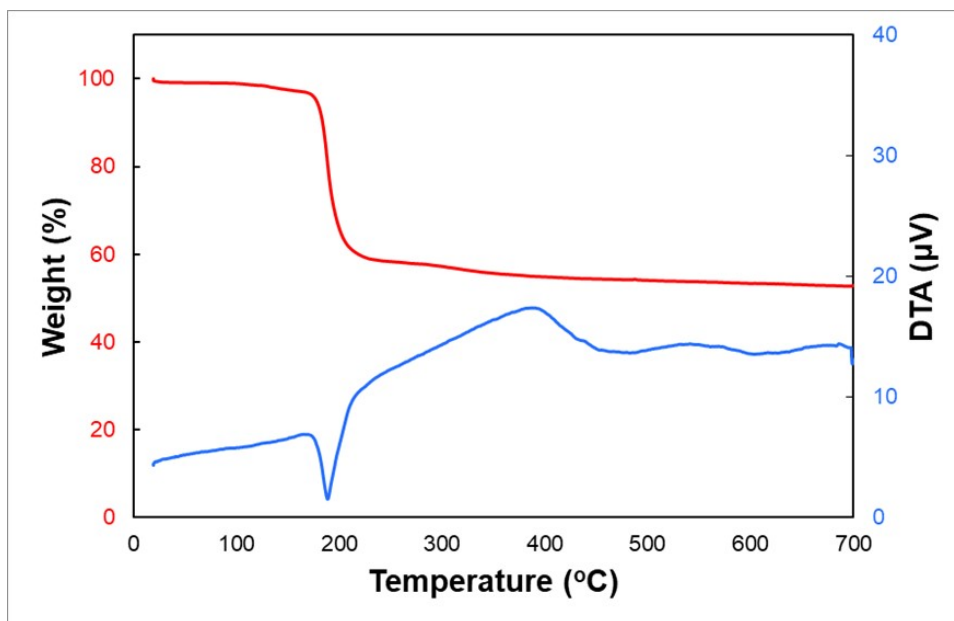

Figure S14. TGA and DTA traces of Ag<sub>14</sub>bpa in N<sub>2</sub> atmosphere.

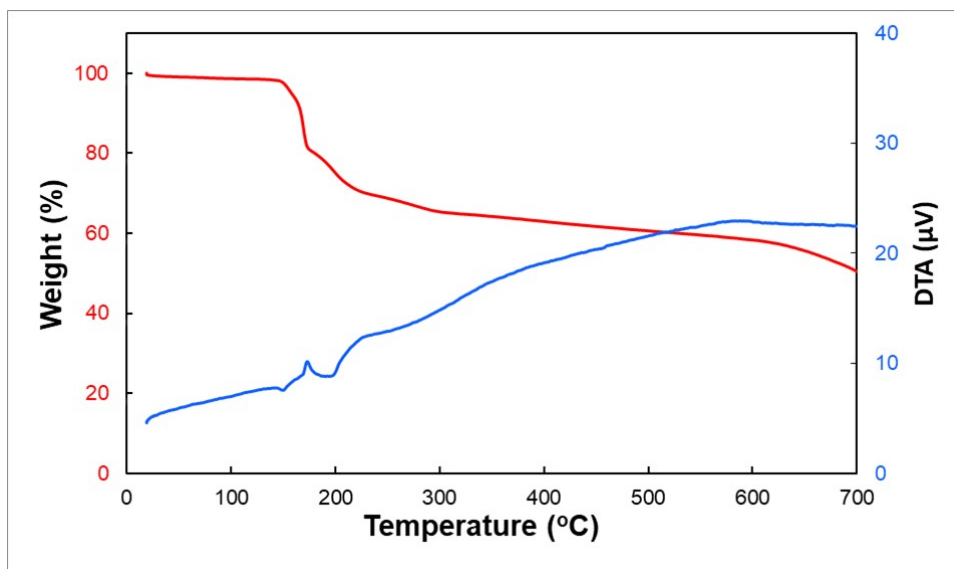

Figure S15. TGA and DTA traces of Ag<sub>12</sub>bpeb in N<sub>2</sub> atmosphere.

## 6. Chemical stability analysis

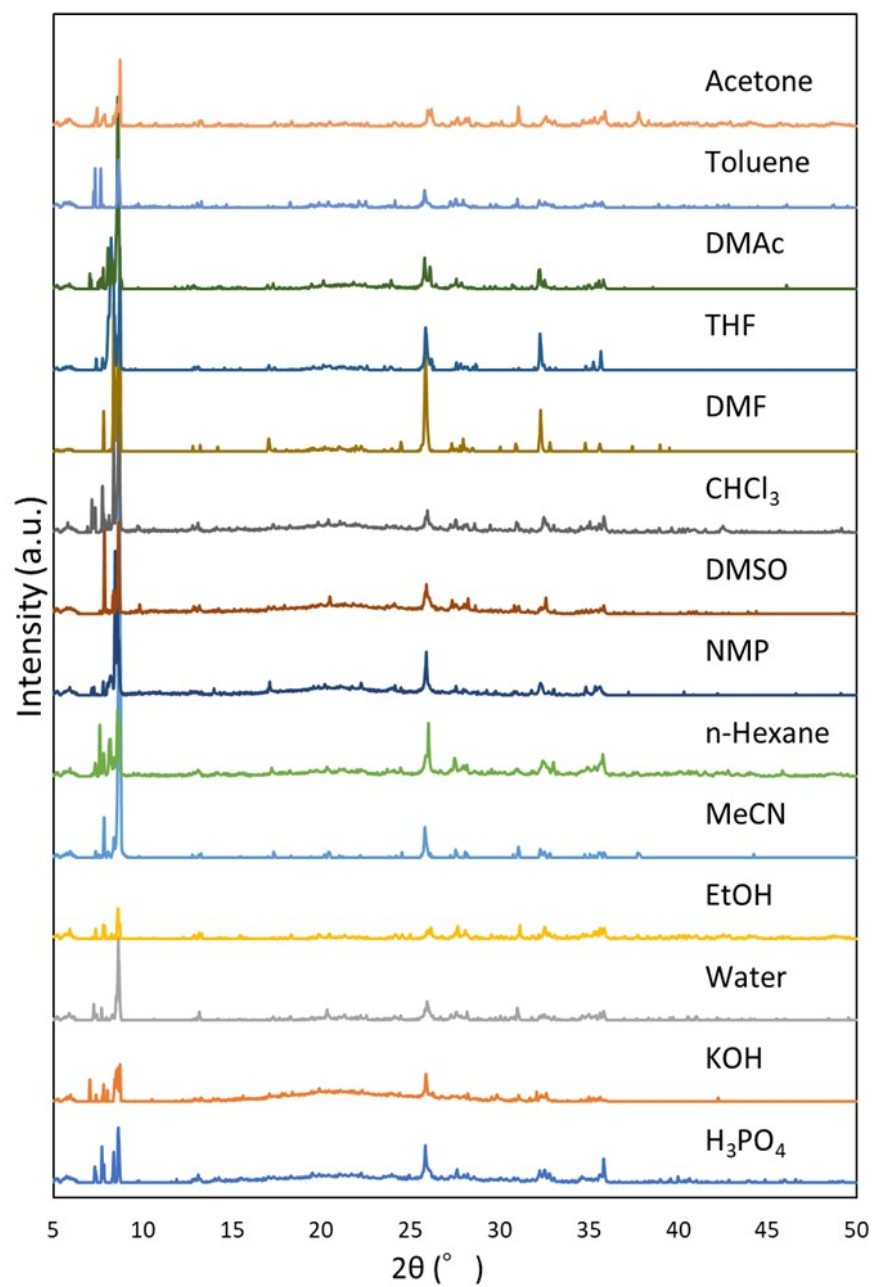

**Figure S16.** PXRD profiles of  $\text{Ag}_{14}\text{bpa}$  after treatment in different solvents.

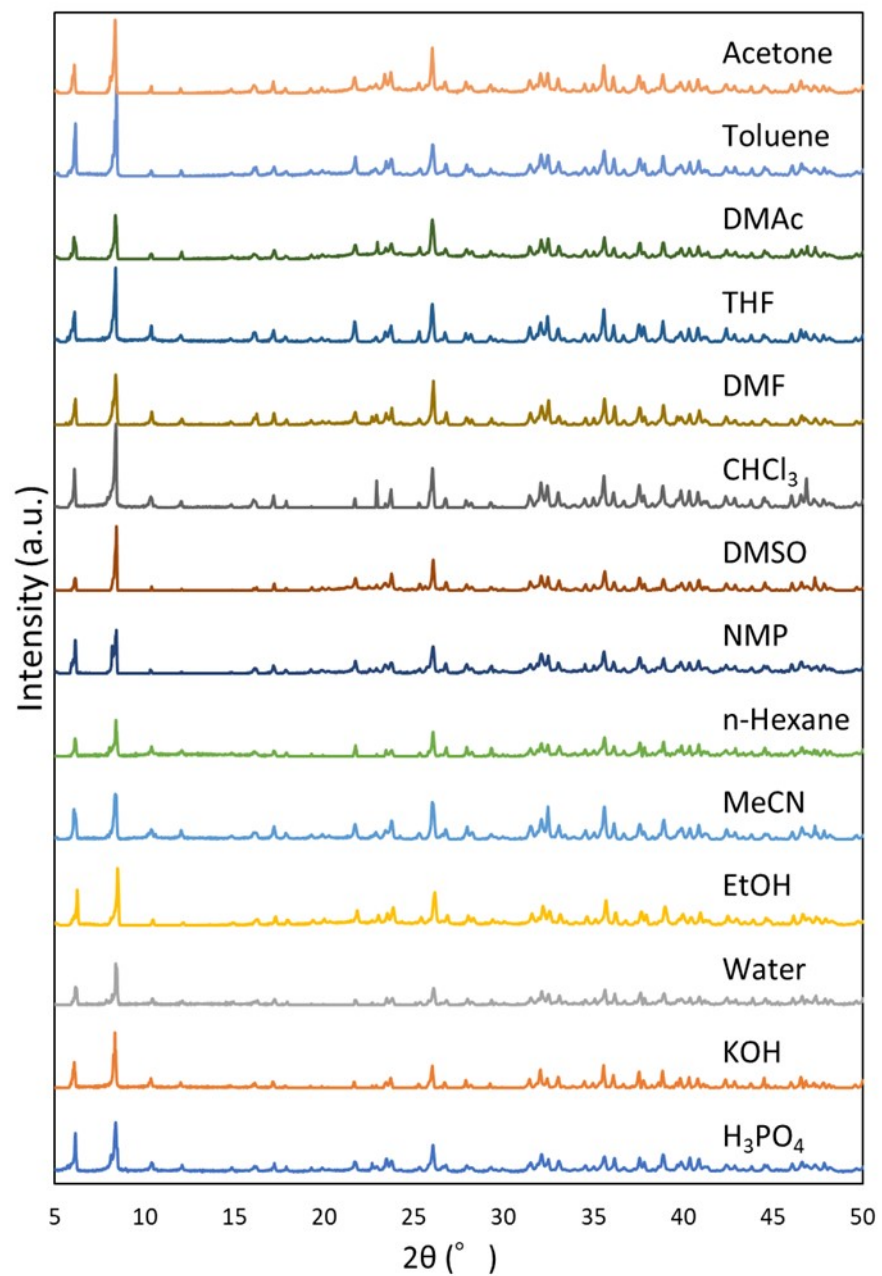

**Figure S17.** PXRD profiles of Ag<sub>12</sub>bpeb after treatment in different solvents.

To ascertain the application potential of the SCAMs as label-free DNA sensors, we immersed the SCAMs in phosphate buffer (pH 7.4) and then performed PXRD of the samples. Despite a decrease in peak intensities, the crystalline structure of the SCAMs was maintained after the treatment.

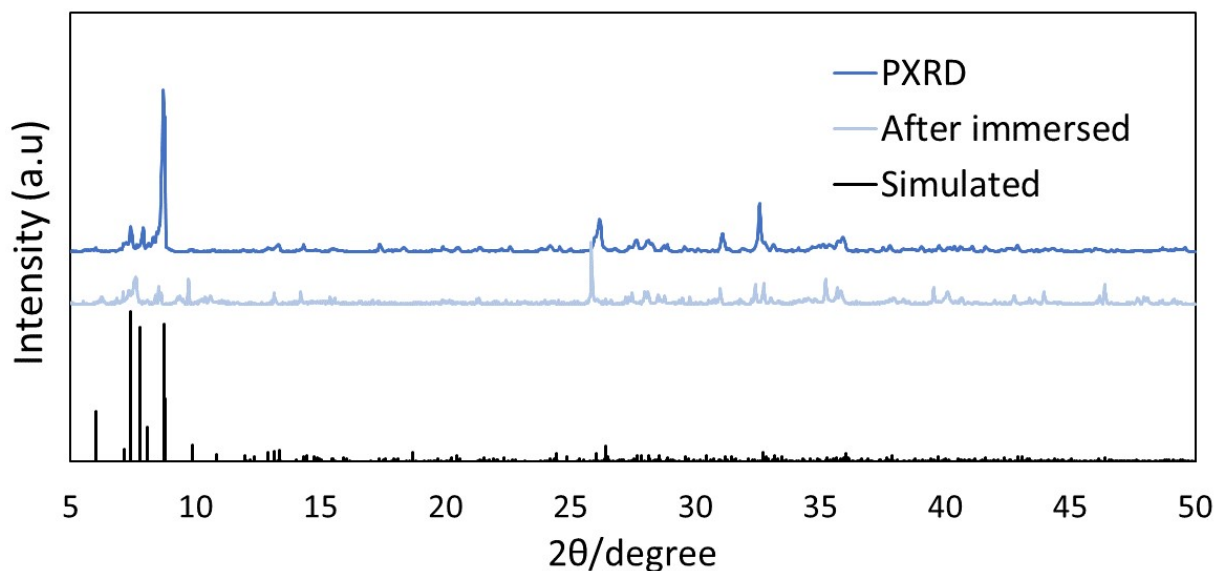

**Figure S18:** XRD patterns of Ag<sub>14</sub>bpa after immersing in phosphate buffer (pH 7.4).

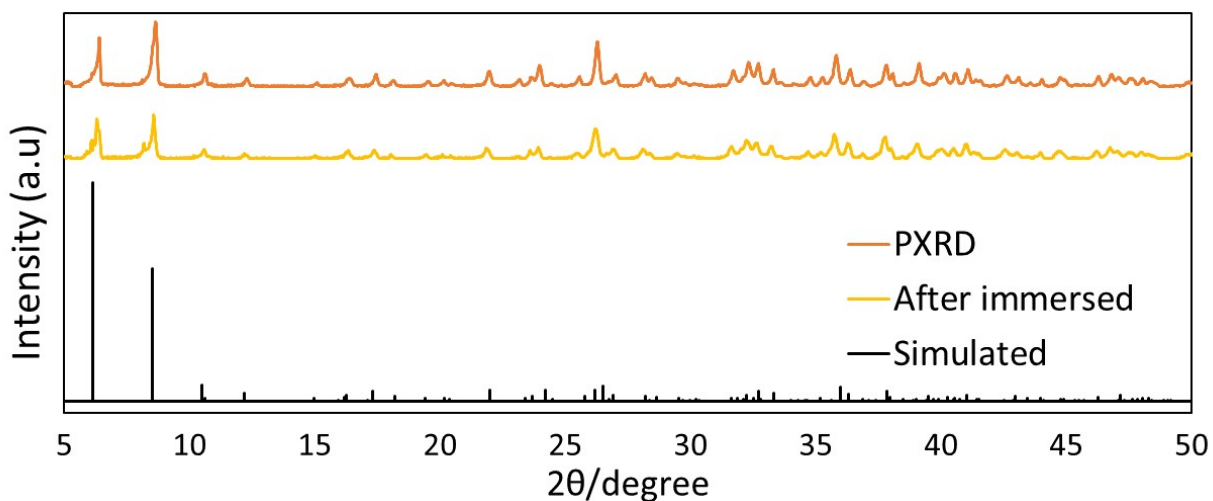

**Figure S19:** XRD patterns of Ag<sub>12</sub>bpeb after immersing in phosphate buffer (pH 7.4).

## 7. Label-free detection of DNA hybridization with SCAMs

The signal-to-noise ratio (SNR)<sup>1</sup> is the ratio of the fluorescence intensities of SYBR Green I dye at 521 nm in the presence (F) and absence (F<sub>0</sub>) of the target DNA, respectively, and is denoted by F/F<sub>0</sub>.

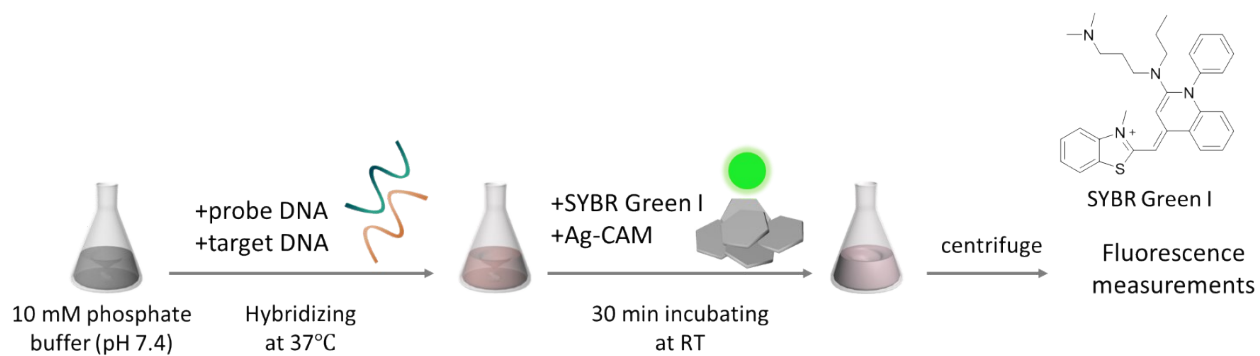

**Figure S20.** Schematic protocol of DNA detection.

In the label-free DNA detection, control experiments were performed with  $\text{CF}_3\text{COOAg}$ ,  $\text{AgS}^t\text{Bu}$  and the organic linkers (bpa and bpeb) to verify whether adding the components constituting the SCAMs alone can change the fluorescence of SYBR Green I. The concentrations of the SCAMs were taken as 0, 5, 10, 20, 30, 40, and 50  $\mu\text{g mL}^{-1}$ . The amount of constituent components contained in each SCAM concentration was calculated according to the table below, and this amount was added to the system for experimentation.  $\text{CF}_3\text{COOAg}$  was treated in aqueous solution, bpa in MeOH solution, and  $\text{AgS}^t\text{Bu}$  and bpeb in MeOH dispersion.

**Table S8.** Amount of constituent components contained in each SCAM concentration

| Composition ratio | $\text{Ag}_{14}\text{bpa}$ | $\text{CF}_3\text{COOAg}$ | $\text{AgS}^t\text{Bu}$ | bpa   | $\text{Ag}_{12}\text{bpeb}$ | $\text{CF}_3\text{COOAg}$ | $\text{AgS}^t\text{Bu}$ | bpeb  |
|-------------------|----------------------------|---------------------------|-------------------------|-------|-----------------------------|---------------------------|-------------------------|-------|
|                   | 100.0%                     | 27.5%                     | 61.3%                   | 11.2% | 100.0%                      | 39.6%                     | 35.3%                   | 25.1% |

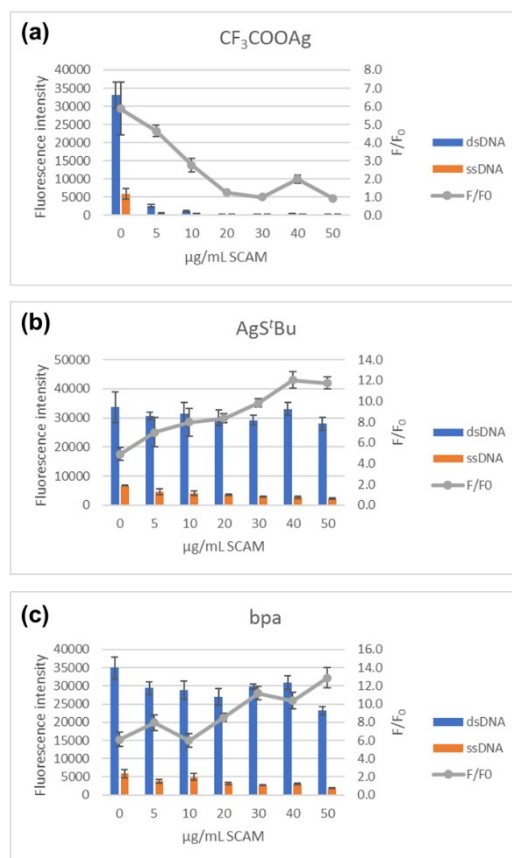

**Figure S21.** (left) Fluorescence intensity of ssDNA and double-stranded DNA (dsDNA) probes with SYBR Green I nucleic acid stain versus concentration of  $\text{Ag}_{14}\text{bpa}$  SCAM, and (right) signal-to-noise ratios ( $F/F_0$ ) with varying concentration of  $\text{Ag}_{14}\text{bpa}$  SCAM, for (a)  $\text{CF}_3\text{COOAg}$ , (b)  $\text{AgS}^t\text{Bu}$  and (c) bpa. The results showed that  $\text{CF}_3\text{COOAg}$  attenuates the fluorescence derived from SYBR Green I when added.  $\text{AgS}^t\text{Bu}$  and bpa show a small change in fluorescence intensity after addition.

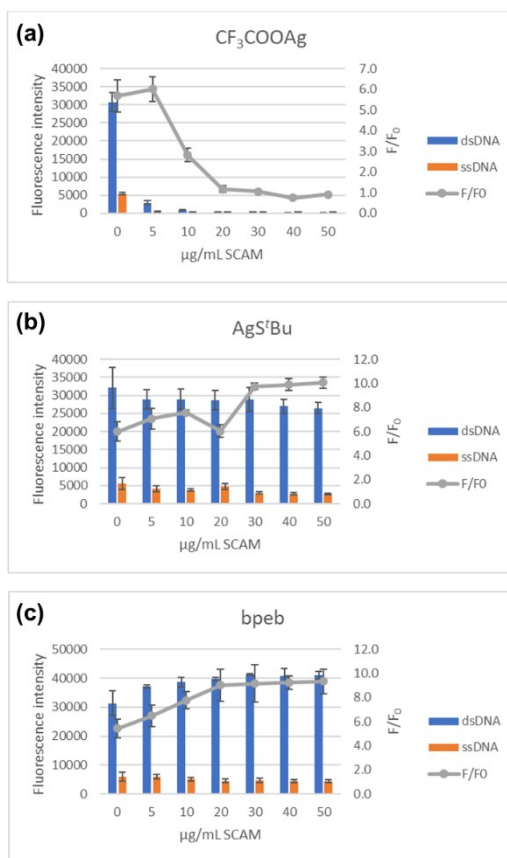

**Figure S22.** (left) Fluorescence intensity of ssDNA and dsDNA probes with SYBR Green I nucleic acid stain versus concentration of Ag<sub>12</sub>bpeb SCAM, and (right) signal-to-noise ratios (F/F<sub>0</sub>) with varying concentration of Ag<sub>12</sub>bpeb SCAM, for (a) CF<sub>3</sub>COOAg, (b) AgS'Bu and (c) bpeb.

The attenuation of SYBR Green I fluorescence with CF<sub>3</sub>COOAg addition was also observed here. AgS'Bu and bpeb show a small change in fluorescence intensity after addition.

## 8. Solid-state $^{13}\text{C}$ CP/MAS Nuclear Magnetic Resonance (NMR) Spectroscopy

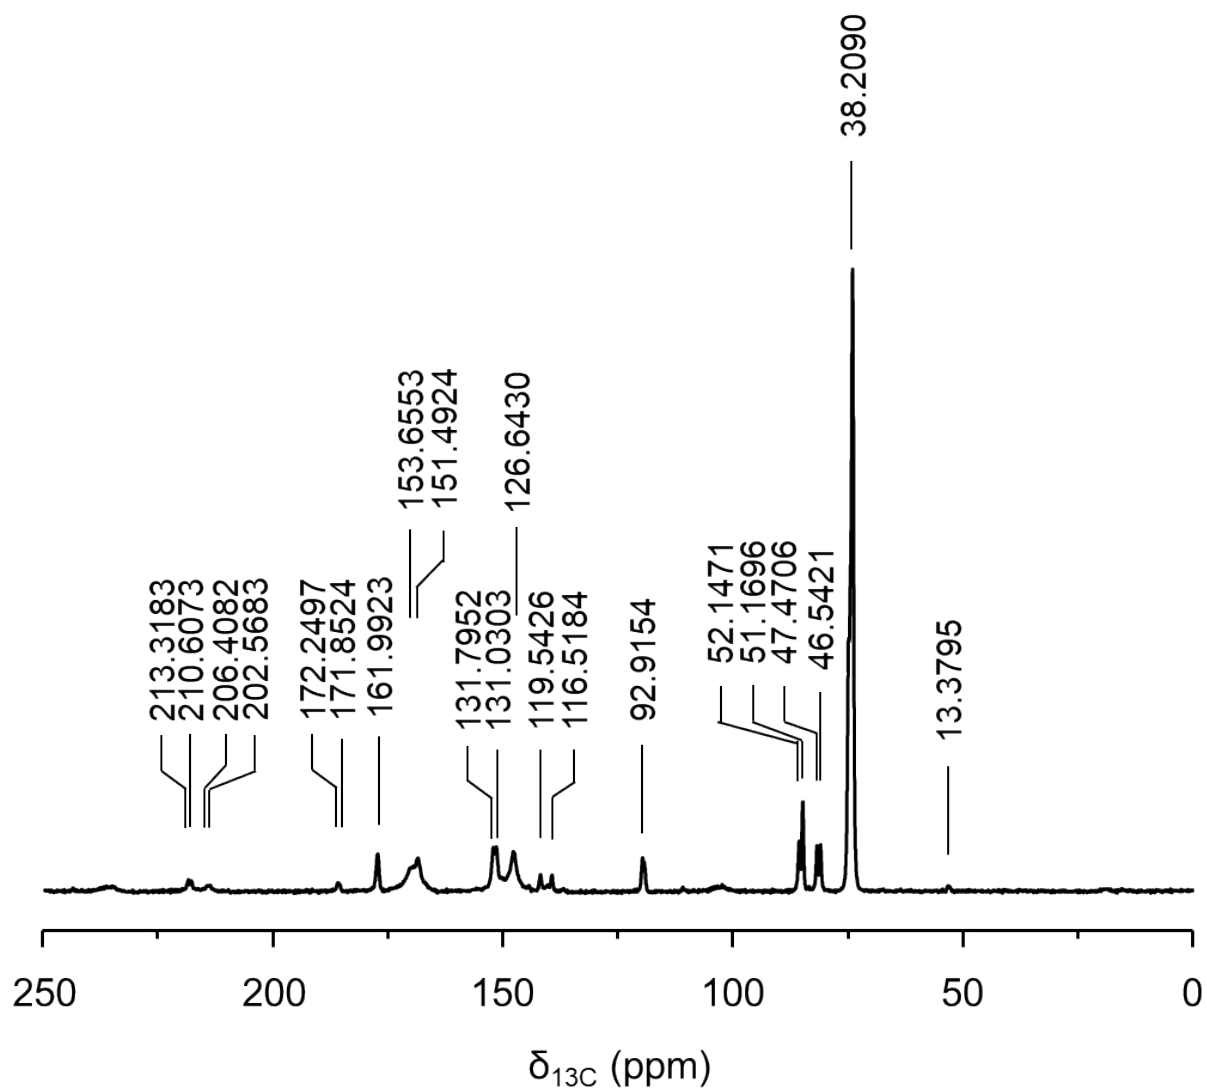

**Figure S23:** Solid-state  $^{13}\text{C}$  CP/MAS NMR spectrum of  $\text{Ag}_{14}\text{bpa}$ .



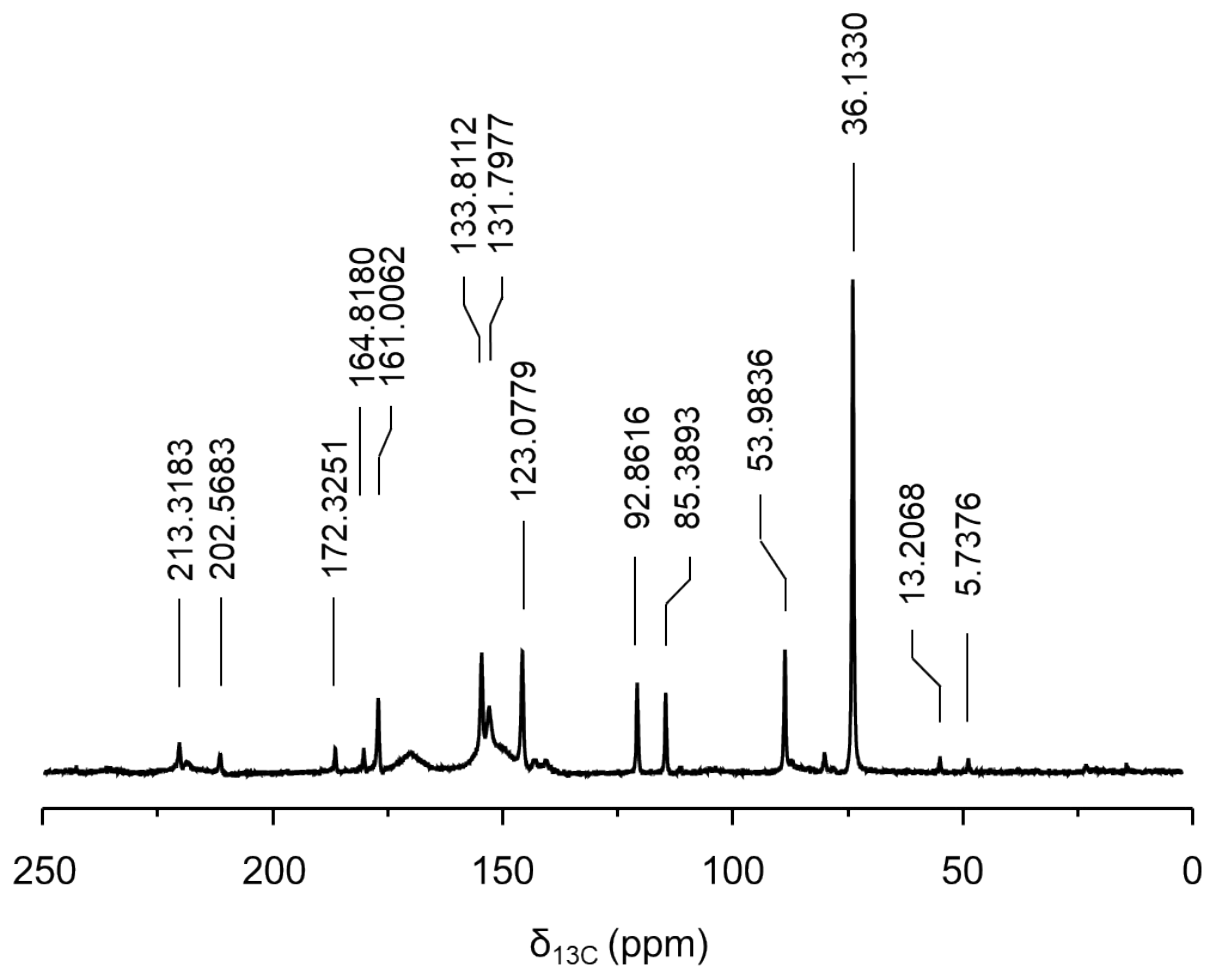

**Figure S24:** Solid-state  $^{13}\text{C}$  CP/MAS NMR spectrum of  $\text{Ag}_{12}\text{bpeb}$ .

## 9. References

- (1) J. M. Fang, F. Leng, X. J. Zhao, X. L. Hu and Y. F. Li, *Analyst*, 2014, **139**, 801–806.
- (2) Bruker APEX3, v2019.1–0, Bruker AXS Inc., Madison, WI, USA, 2019.
- (3) B. K. Teo, Y. H. Xu, B. Y. Zhong, Y. K. He, H. Y. Chen, W. Qian, Y. J. Deng and Y. H. Zou, *Inorg. Chem.*, 2001, **40**, 6794–6801.
- (4) N. R. Champness, A. N. Khlobystov, A. G. Majuga, M. Schröder and N. V. Zyk, *Tetrahedron Lett.*, 1999, **40**, 5413–5416.
